# Supplementary material
Source: publisher figshare collection journal article supplement (https://tandf.figshare.com/ndownloader/files/29077256)
Supplement: Supplementary file 1 [file 29077256]

**SUPPLEMENTARY A**

**Consort diagram**


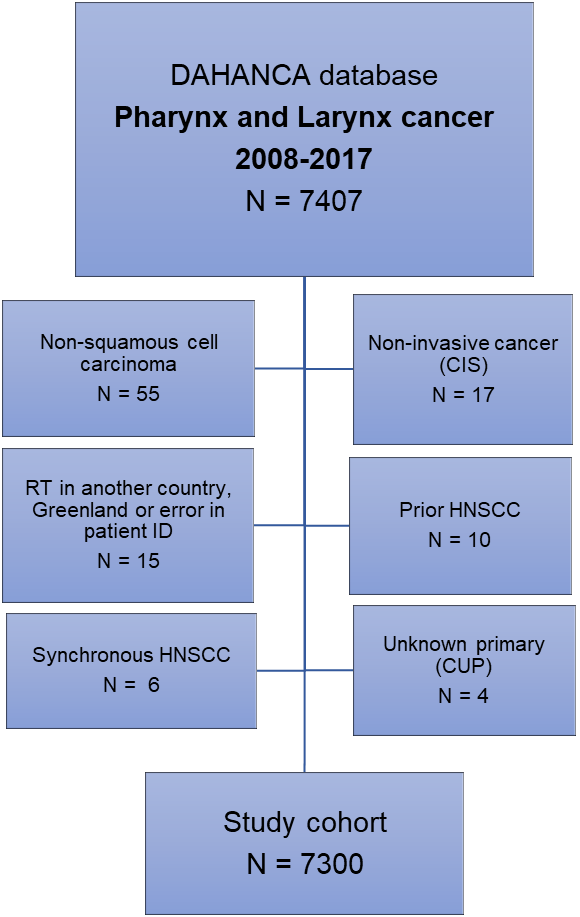


CIS: Carcinoma in situ

CUP: Carcinoma of unknown primary

RT: Radiotherapy

**Supplementary A:**  Consort diagram showing the inclusion process of the study cohort. Known synchronous HNSCC and unknown primaries were excluded up front and the number displayed shows patients excluded after additional cleaning of data.
